# Supplementary material
Source: Springer Nature journal article supplement (https://www.springermedizin.de/resource/supplementary/12913_2013_3176_MOESM3_ESM.docx/9532598)
Supplement: MOESM3 [file 9532598]

Box 3: Demographics of the participants

| **Focus group** | **Age (mean)** | **Gender** | **Length of nursing experience (mean)** |
| --- | --- | --- | --- |
| Hospital care | 34 years | 3 male, 3 female | 13 years |
| Mental health care | 36 years | 2 male, 4 female | 16 years |
| Nursing home care | 51 years | 8 female | 19 years |
| Home care | 46 years | 6 female | 22 years |
